# Supplementary material for: Can a Forest Tree Species Progeny Trial Serve as an Ex Situ Collection? A Case Study on Alnus glutinosa
Source: MDPI journal article supplement (doi:10.3390/plants12233986), 2023-11-27

number of alleles found in *A. glutinosa* Vytėnai progeny trial per different allele frequency categories represented for different sample groups

A: allele copy number in one family on average, when single population frequencies are used;  
B: allele copy number in six families, when single population frequencies are used;  
C: allele copy number in 22 families, when single population frequencies are used;  
D: allele copy number in six families, when five populations average frequencies are used;  
E: allele copy number in 22 families, when five populations average frequencies are used;  
F: allele copy number in 22 families, when 10 populations average frequencies are used.

\*families no 103, 121, 135, 139, 89 and 97.

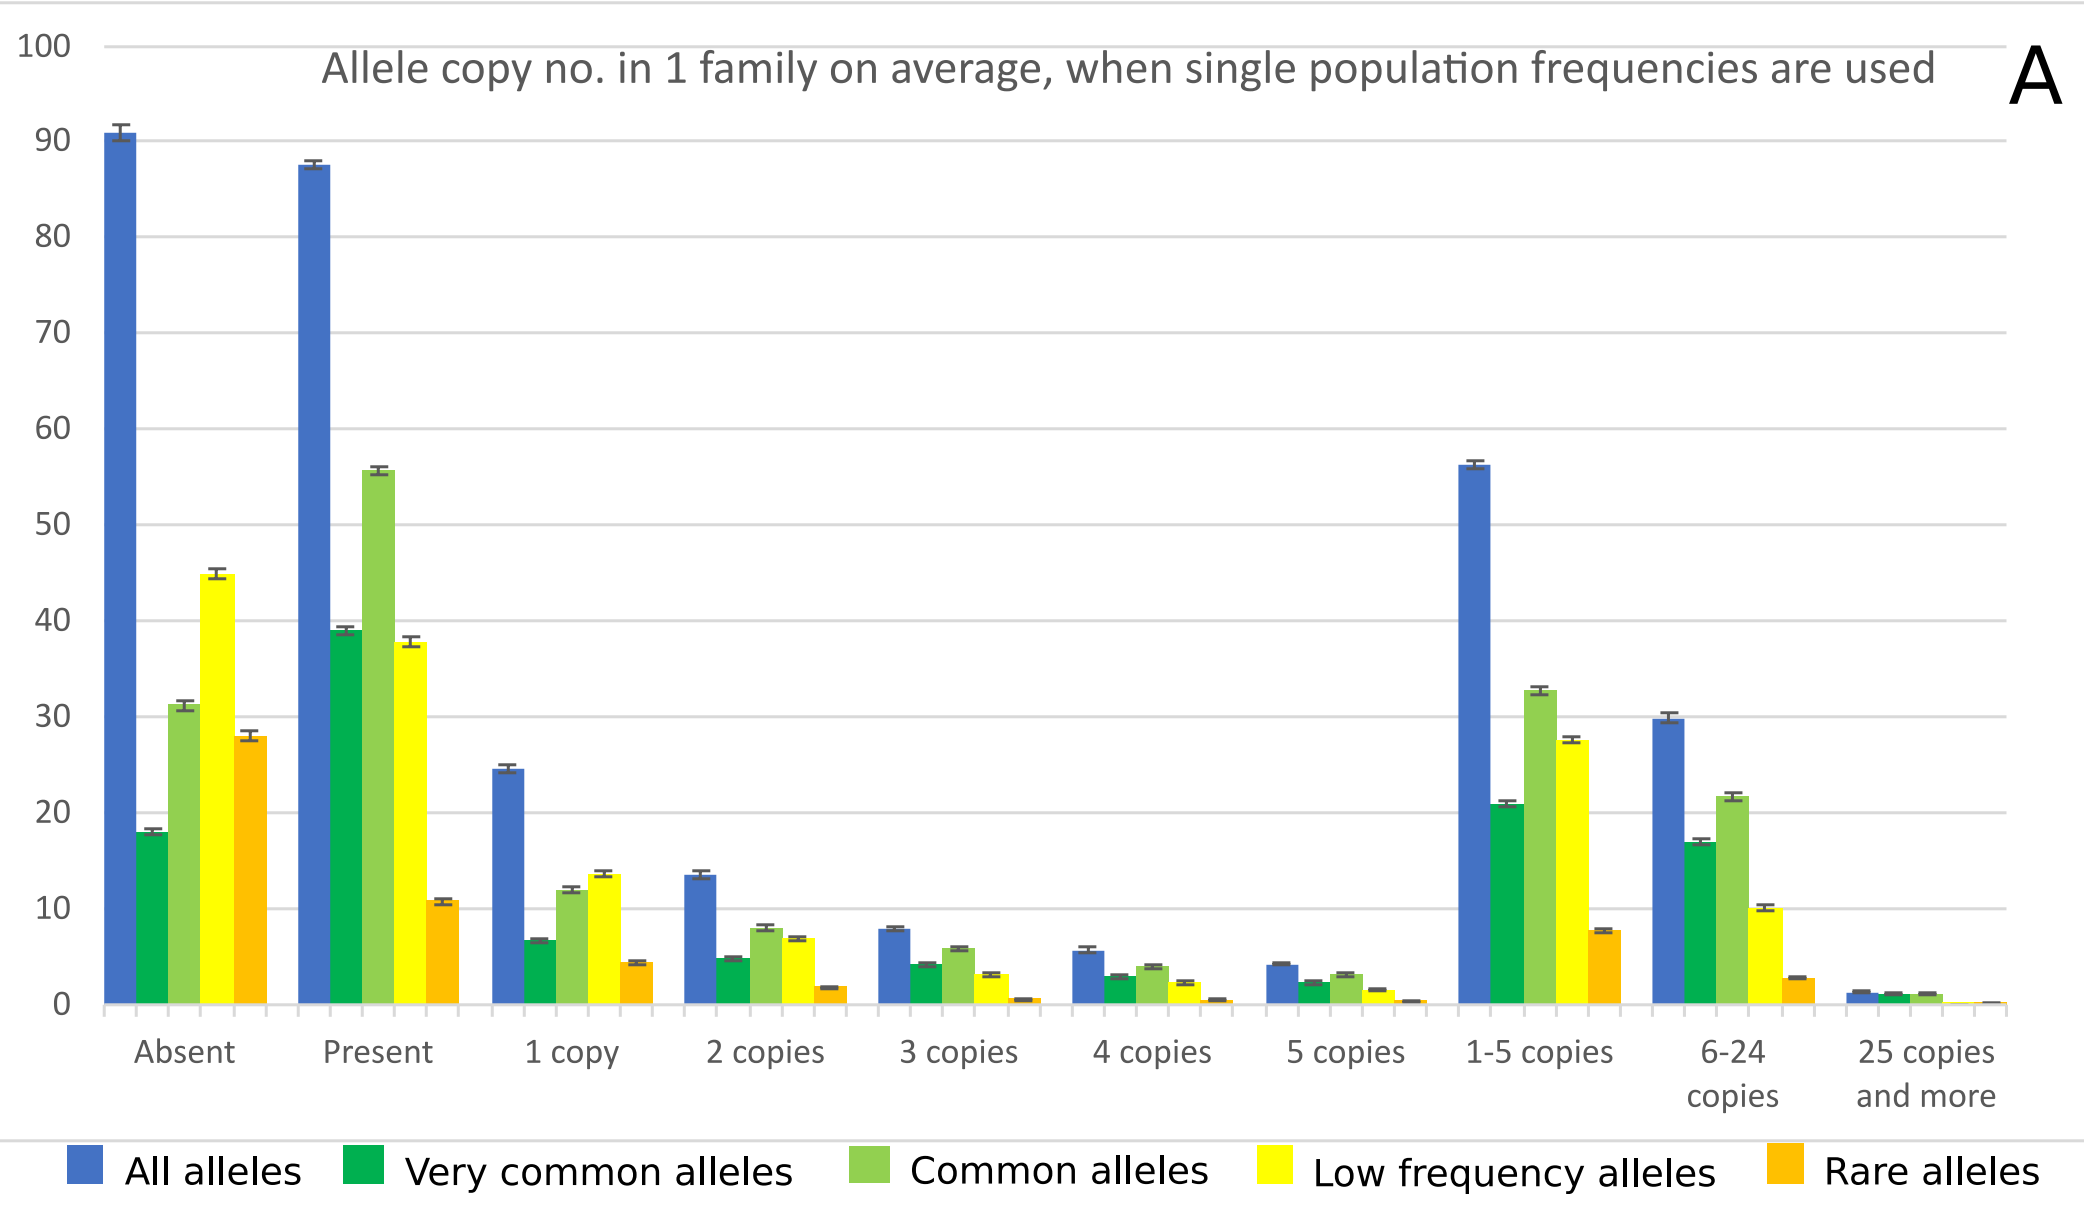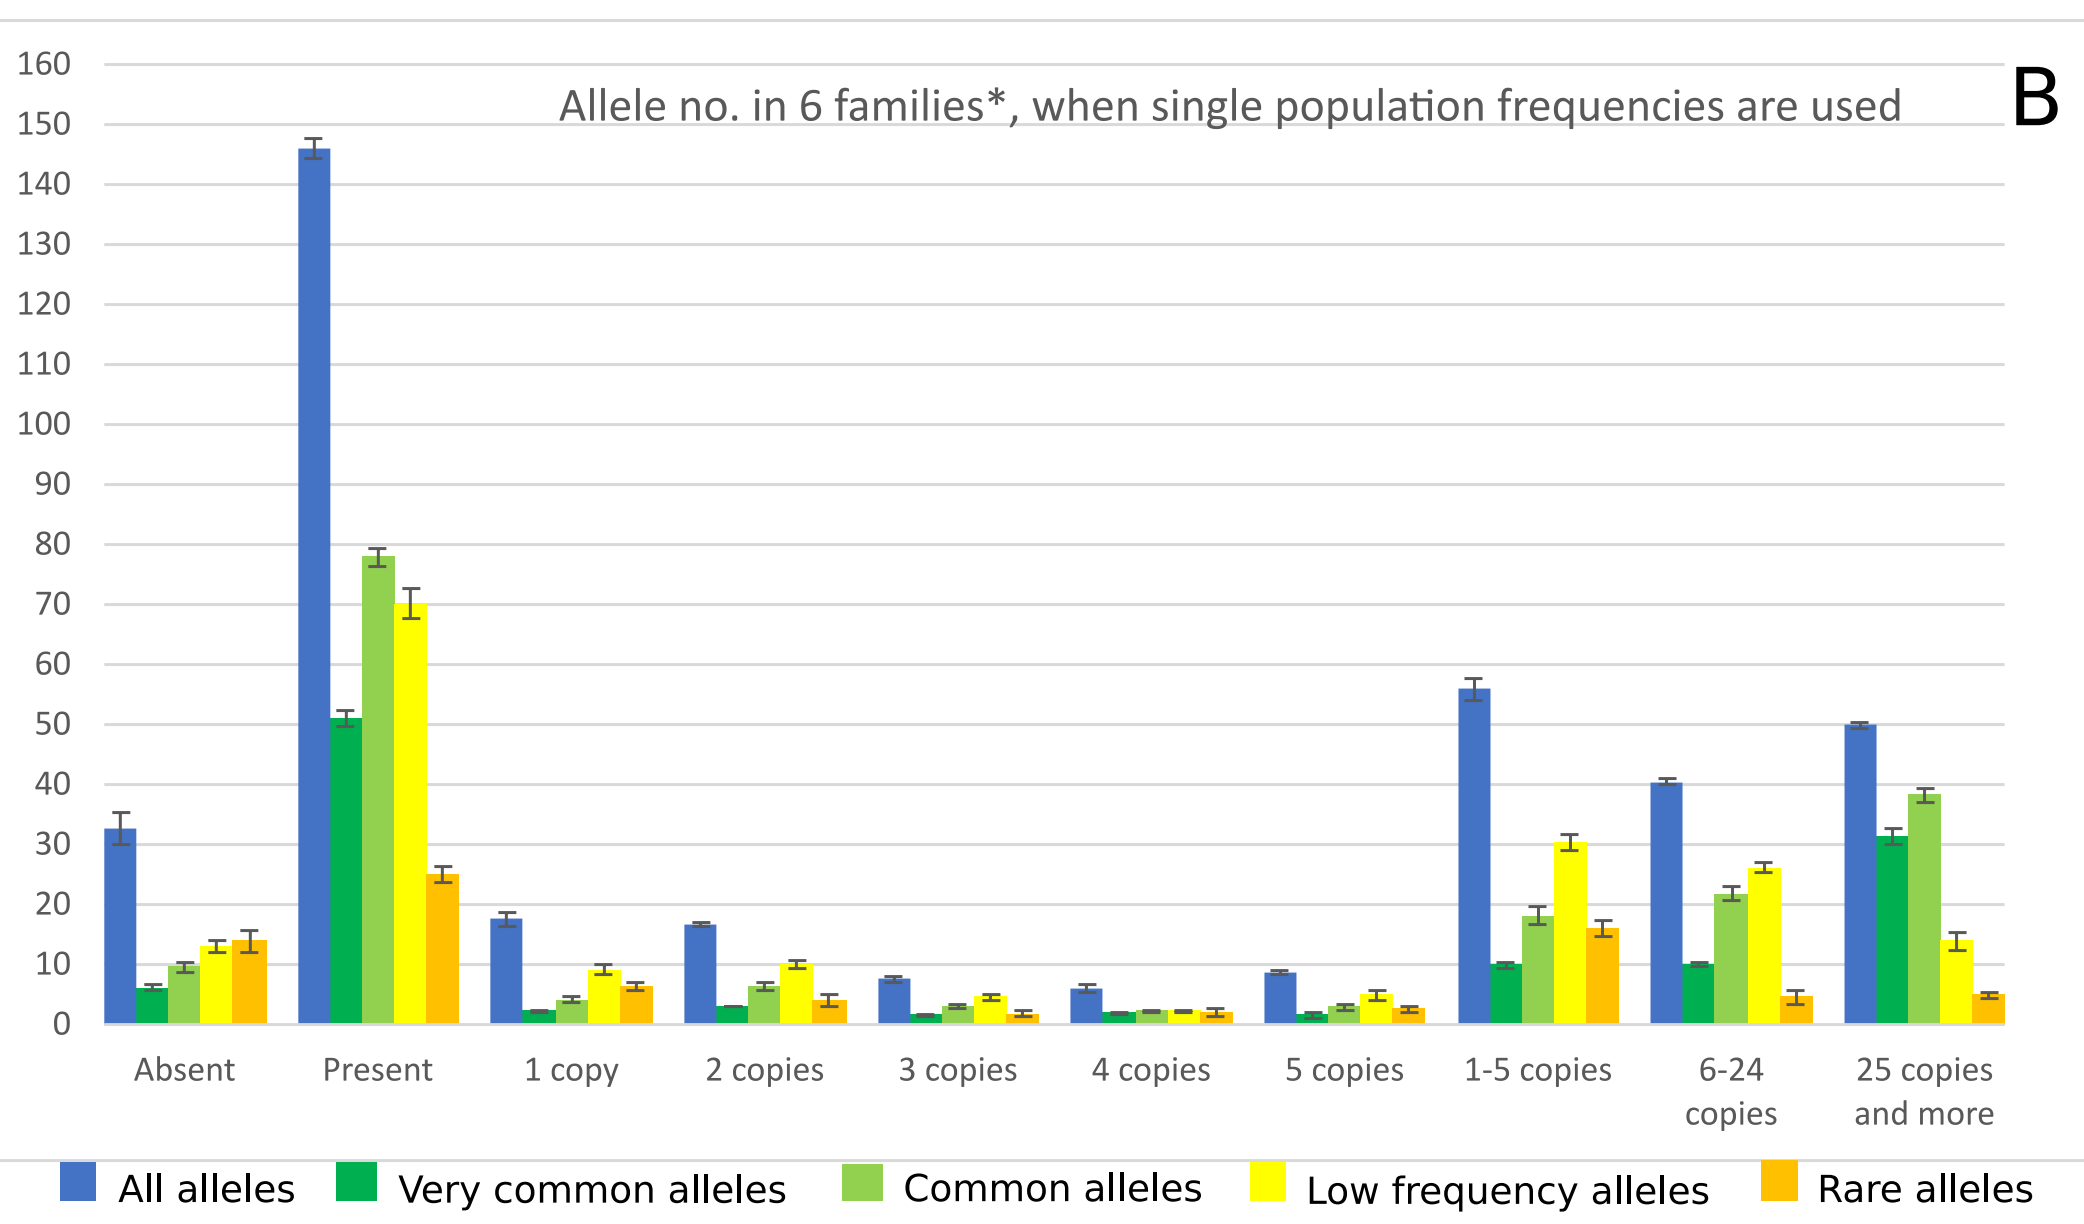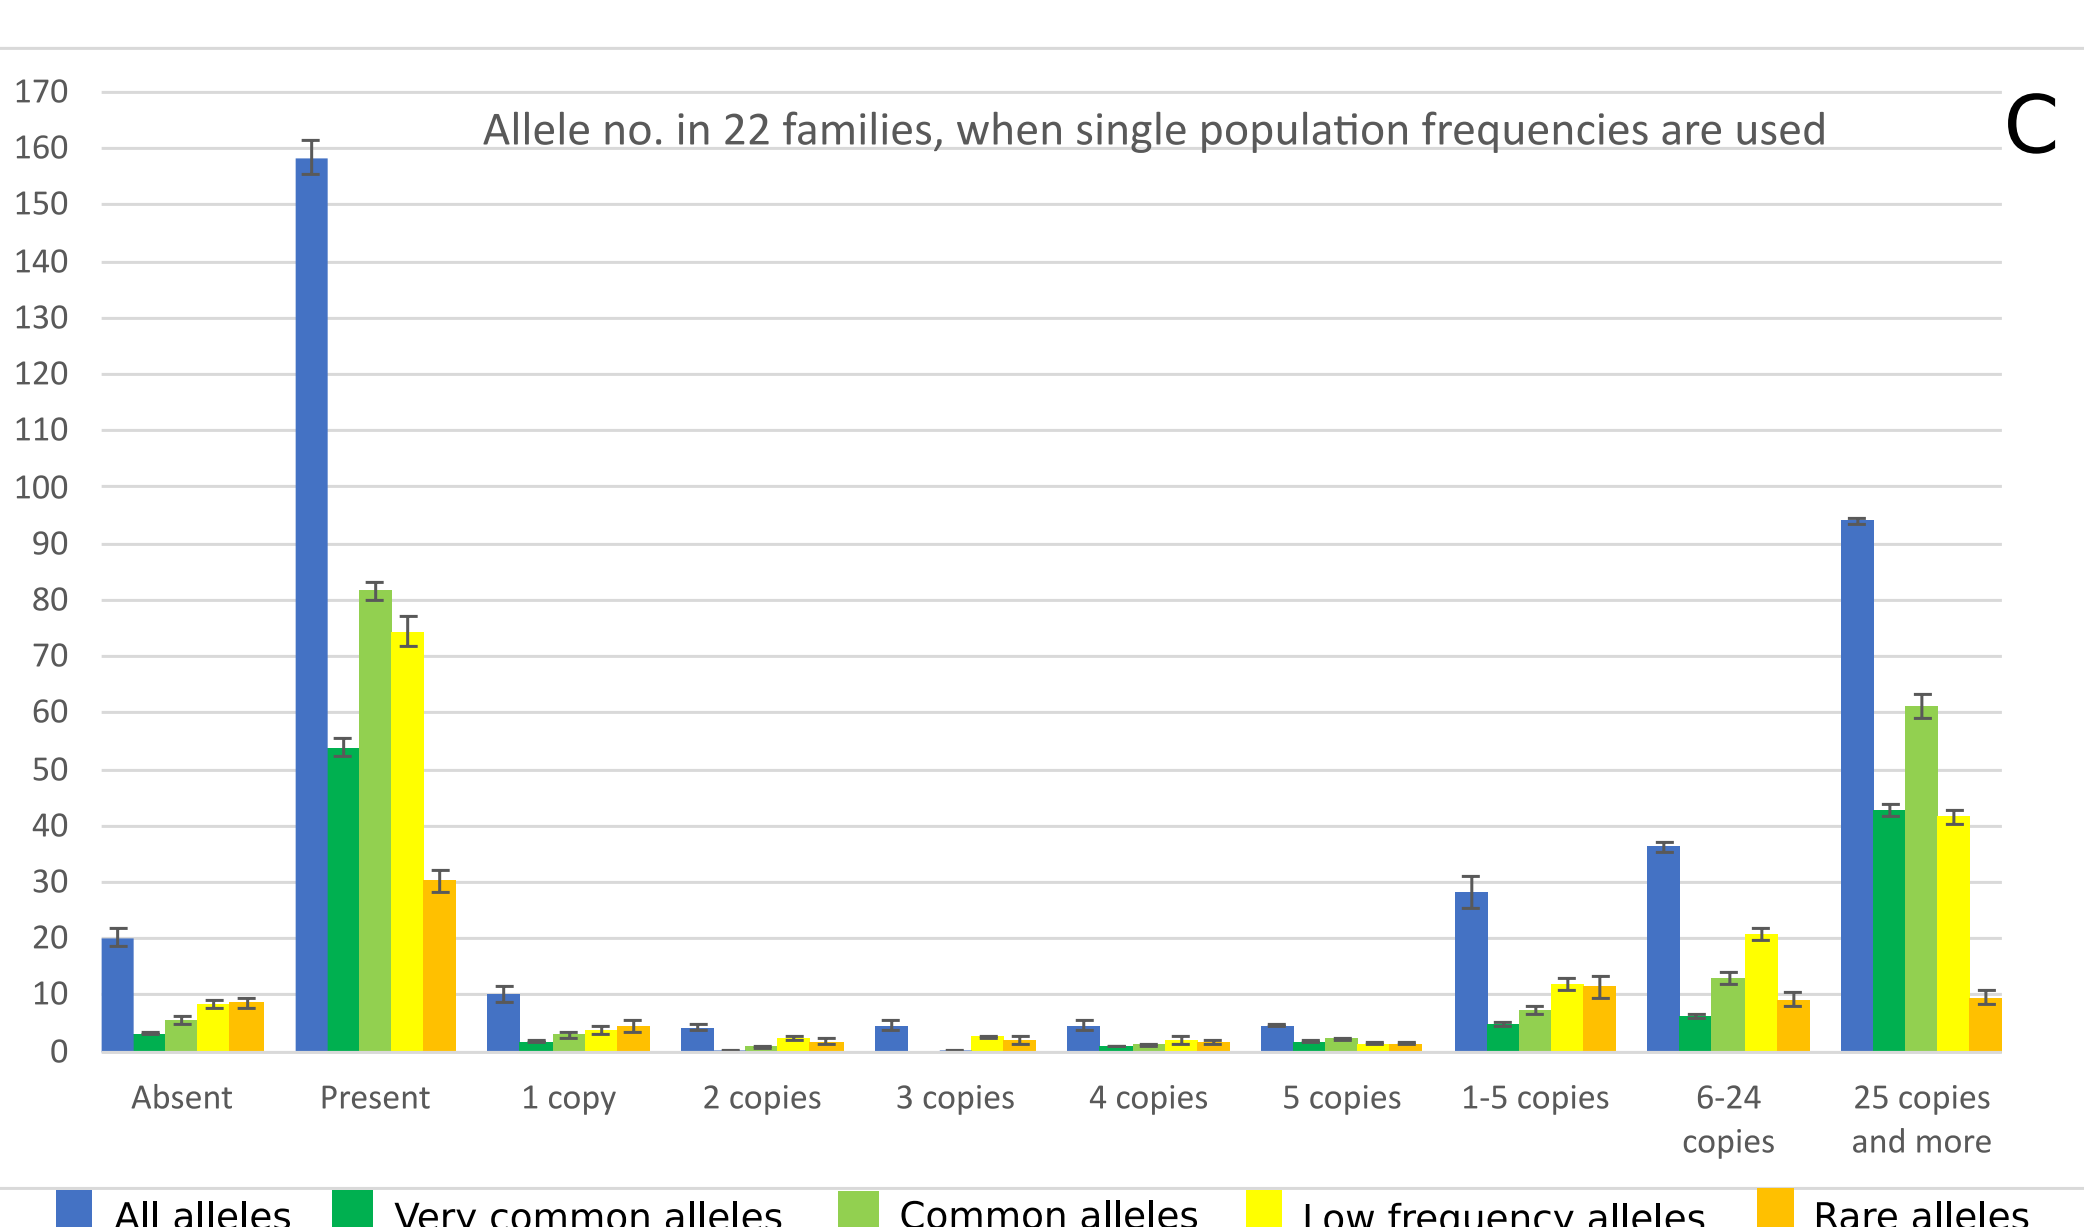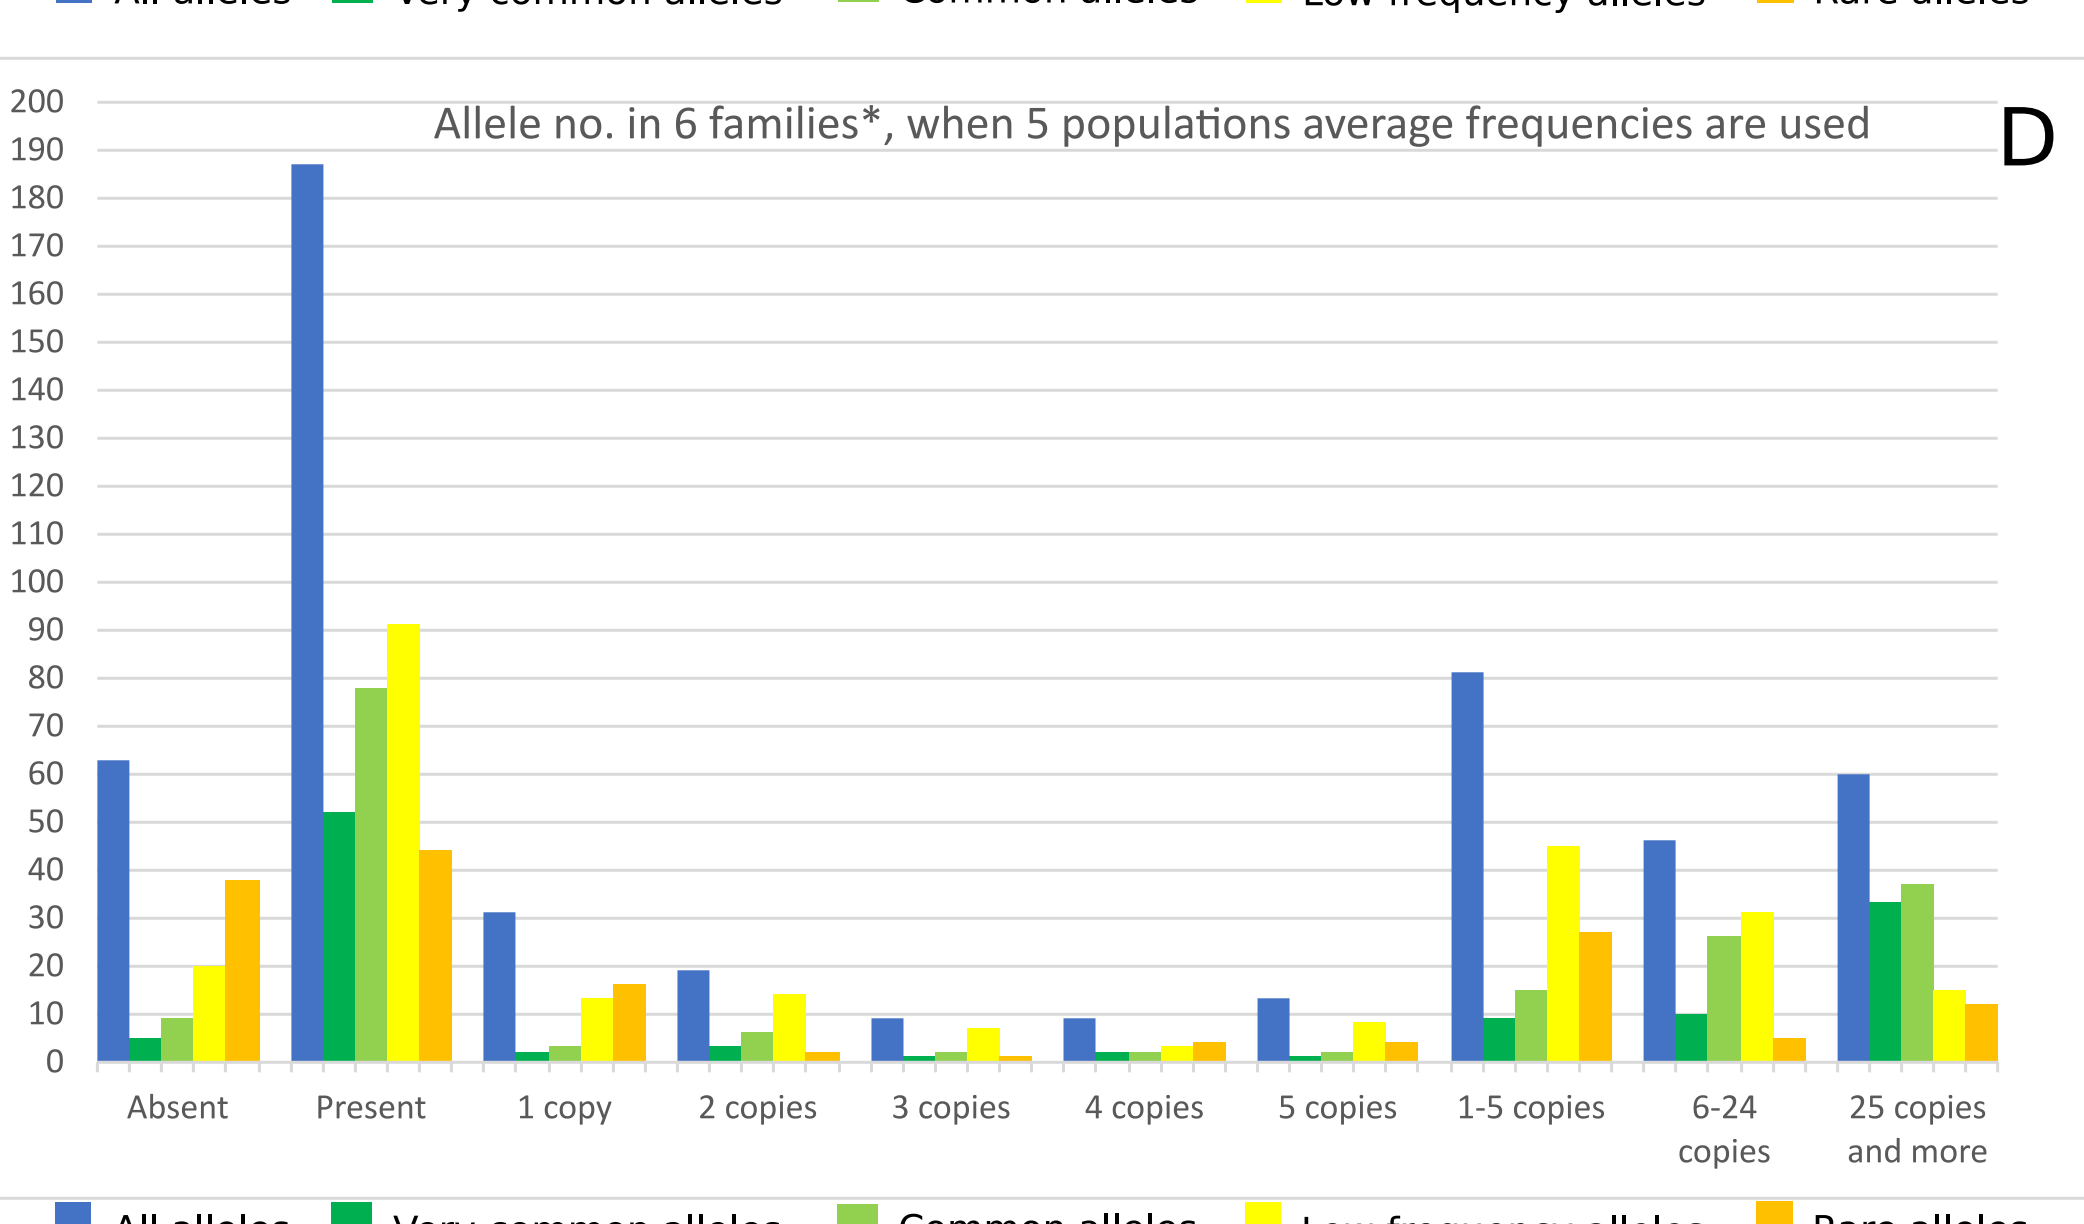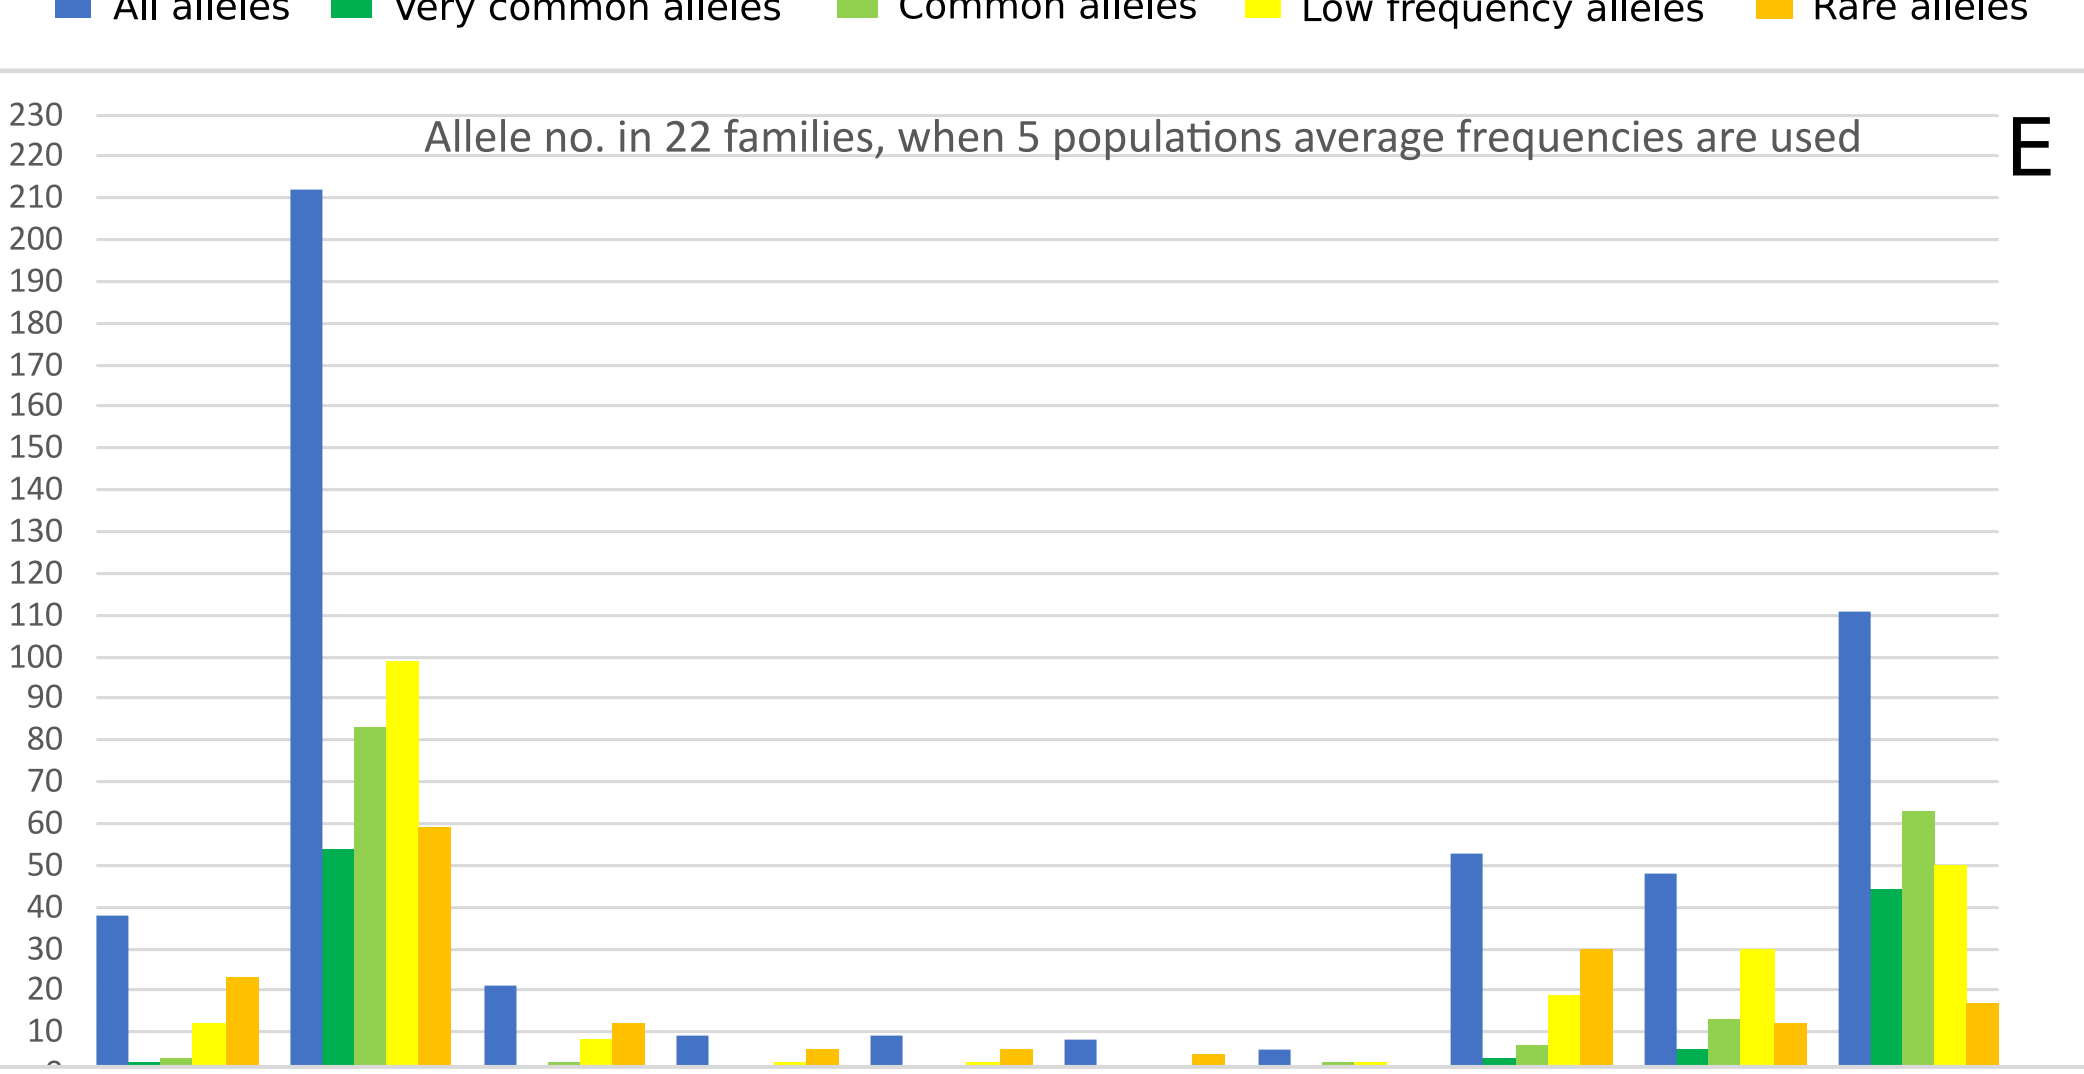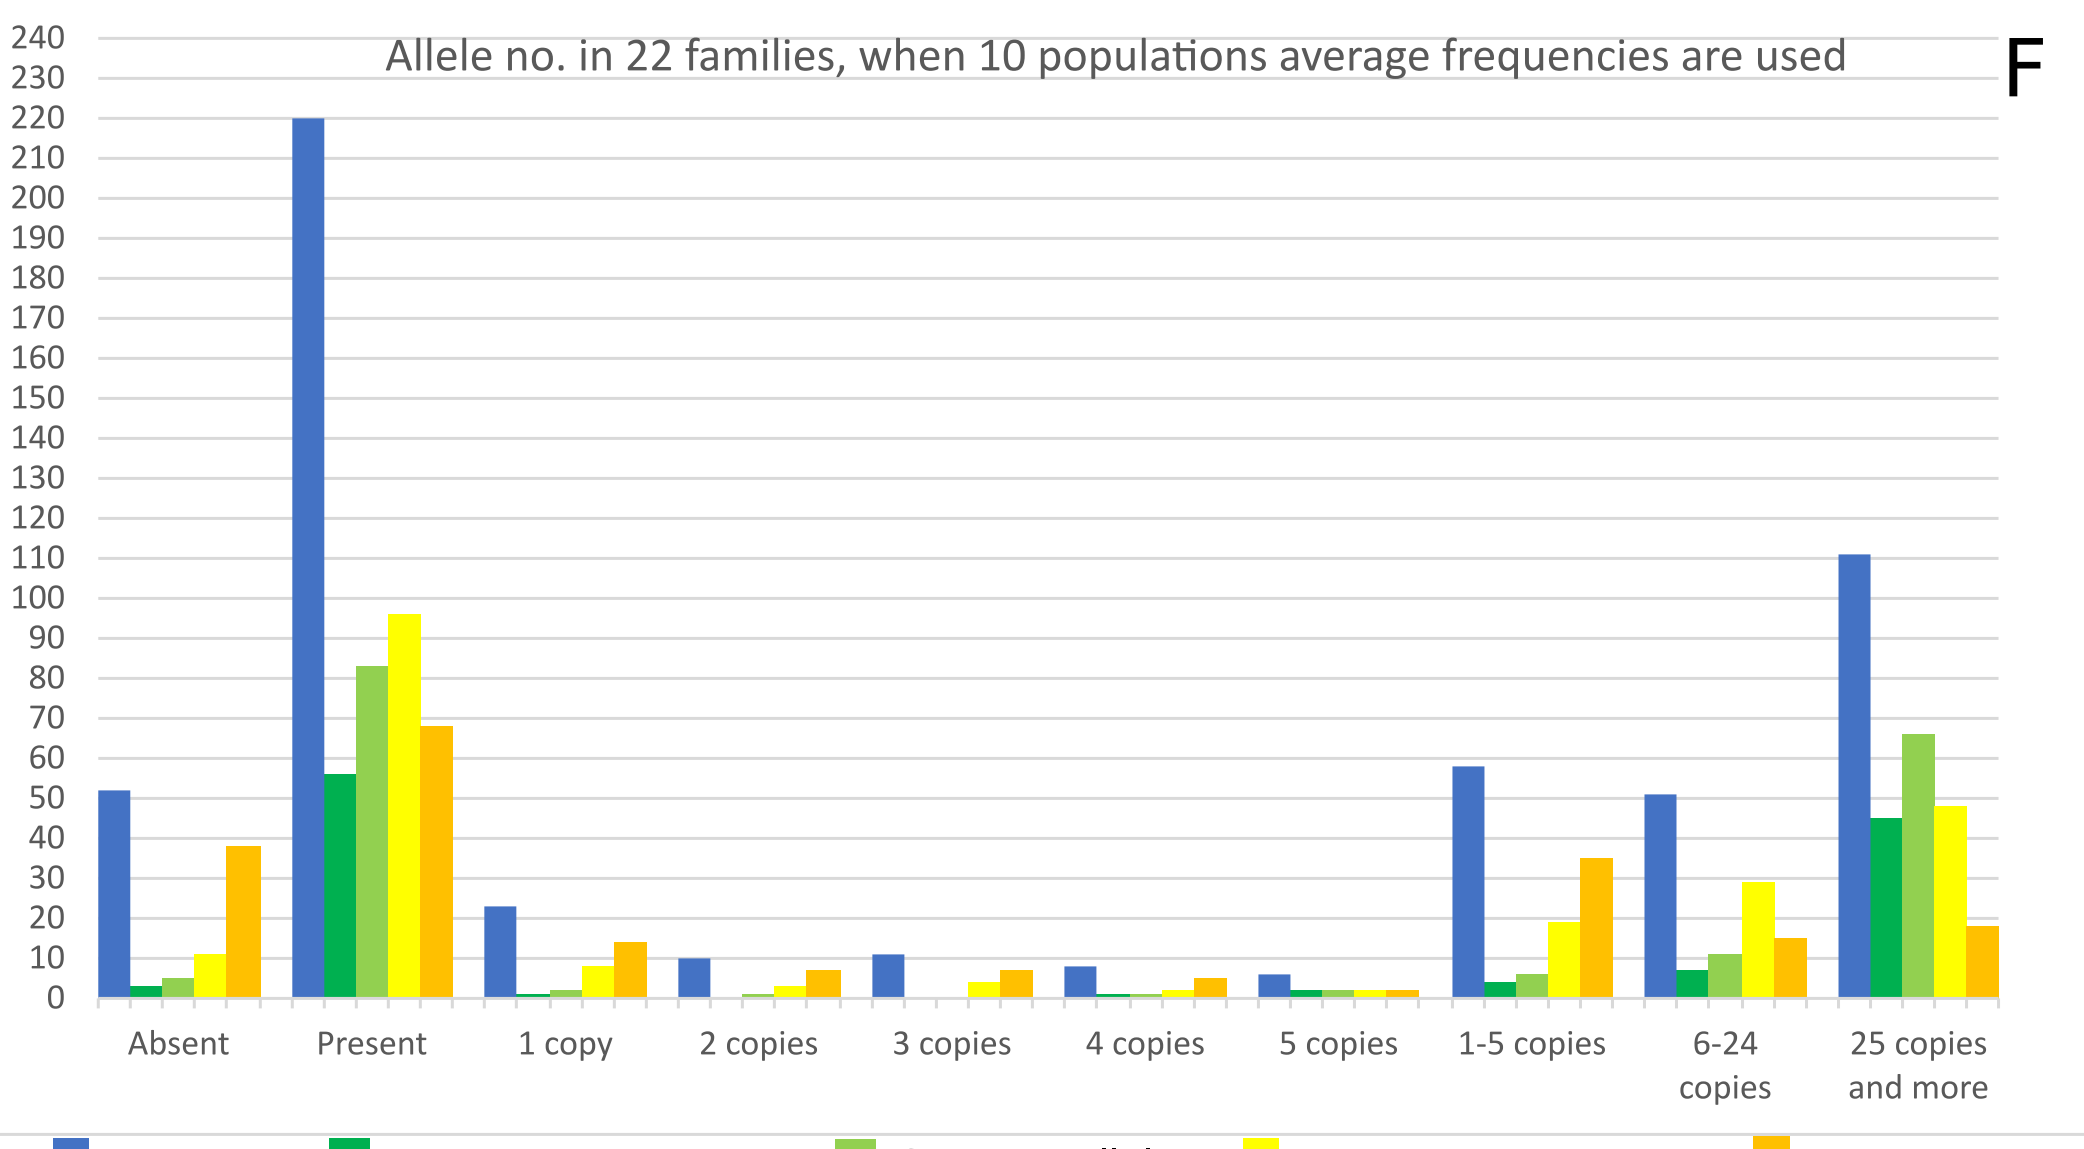

Supplement: s1 [file s1]
