# Supplementary material for: Can a Forest Tree Species Progeny Trial Serve as an Ex Situ Collection? A Case Study on Alnus glutinosa
Source: MDPI journal article supplement (doi:10.3390/plants12233986), 2023-11-27
Supplement: s1 [file s1]

**Table S3.** *A. glutinosa* populations used for genetic diversity comparisons. The shaded GCUs had progenies in Vytėnai progeny trial.

| Abbrev. | GCU code      | GCU                                    |              | No of trees sampled | SFE branch and forest district          | regional | Coordinates                 |
|---------|---------------|----------------------------------------|--------------|---------------------|-----------------------------------------|----------|-----------------------------|
| JUO     | 35JSM037      | Juodkrantė stand                       | seed         | 58                  | Kretinga                                | r.p.,    | 55°36'30.899" 21°7'54.800"  |
| VIL     | 33JGD008      | Žalioji alder genetic reserve          | forest black | 60                  | Juodkrantė Kazlų Rūda Šunskai           | r.p.,    | 54°43'7.284" 22°57'25.091"  |
| LEI     | 03JSM049      | Leipalingis stand                      | seed         | 60                  | Druskininkai                            | r.p.,    | 54°10'37.704" 23°48'10.007" |
| GIR     | 32JSM040      | Girios seed stand                      |              | 60                  | r.p., Leipalingis Šalčininkai Rūdninkai | r.p.,    | 54°24'44.171" 5°3'15.552"   |
| SIM     | 17JGD019      | Šimkaičiai black alder genetic reserve | forest       | 60                  | Raseiniai Šimkaičiai                    | r.p.,    | 55°11'40.416" 22°50'9.672"  |
| PUR     | 31JSM030      | Purviniškės stand                      | seed         | 60                  | Nemenčinės Asveja                       | r.p.,    | 55°0'55.224" 25°37'39.108"  |
| BAT     | 18JGD018      | Bijotai alder genetic reserve          | forest black | 60                  | Tauragė Batakliai                       | r.p.,    | 55°20'9.564" 22°28'23.232"  |
| PAZ     | 53JGD005 /006 | Tryškiai alder genetic reserve         | forest black | 60                  | Kuršėnai Pažiužmėliai                   | r.p.,    | 56°3'28.943" 22°43'11.891"  |
| MIK     | 60JSM044      | Mikoliškės stand                       | seed         | 58                  | Kretinga Kartena                        | r.p.,    | 55°47'57.804" 21°29'43.835" |
| SPA     | 01JGD001      | Biržai Forest alder genetic reserve    | black        | 61                  | Biržai Spalviškės                       | r.p.,    | 56°15'38.159" 24°58'55.308" |
