# Supplementary material for: Can a Forest Tree Species Progeny Trial Serve as an Ex Situ Collection? A Case Study on Alnus glutinosa
Source: MDPI journal article supplement (doi:10.3390/plants12233986), 2023-11-27
Supplement: s1 [file s1]

**Table S2.** *A. glutinosa* open pollinated families, sampled in the Vytėnai progeny plantation, their origin and the number of samples used in this study. The shaded open pollinated families originate from GCUs investigated in this study.

| No. | OP Family/Plus tree no. | No of tree sampled per OP family | SFE regional branch and forest district where the plus tree is located | Coordinates    |                |
|-----|-------------------------|----------------------------------|------------------------------------------------------------------------|----------------|----------------|
| 1.  | 103/33JPL103            | 20                               | Kazlų Rūda r.b., Šunskai                                               | 54°43'5.8764"  | 22°57'23.961"  |
| 2.  | 104/33JPL104            | 20                               | Kazlų Rūda r.b., Varnabūdė                                             | 54°35'53.376"  | 23°37'50.484"  |
| 3.  | 107/34JPL107            | 16                               | Šakiai r.b., Gerdžiai                                                  | 54°57'28.278"  | 23°20'0.3048"  |
| 4.  | 108/34JPL108            | 20                               | Šakiai r.b., Šakiai                                                    | 55°1'52.914"   | 23°4'7.4136"   |
| 5.  | 112/14JPL112            | 18                               | Panevėžys r.b., Gegužinė                                               | 55°48'42.8646" | 24°29'31.6674" |
| 6.  | 116/08JPL116            | 20                               | Trakai r.b., Pravieniškės                                              | 54°56'26.304"  | 24°9'19.692"   |
| 7.  | 119/08JPL119            | 19                               | Trakai r.b., Pravieniškės                                              | 54°52'43.9968" | 24°21'48.9312" |
| 8.  | 121/18JPL121            | 17                               | Tauragė r.b., Batakliai                                                | 55°20'18.9456" | 22°28'16.0962" |
| 9.  | 126/52JPL126            | 20                               | Kazlų Rūda r.b., Kazlų Rūda                                            | 54°41'13.56"   | 23°32'36.4554" |
| 10. | 128/29JPL128            | 20                               | Druskininkai r.b., Musteikos                                           | 53°57'18.3888" | 24°24'39.276"  |
| 11. | 132/51JPL132            | 20                               | Dubrava r.b., Vaišvydava                                               | 54°49'22.512"  | 24°7'28.308"   |
| 12. | 135/35JPL135            | 20                               | Kretinga r.b., Juodkrantė                                              | 55°36'34.5384" | 21°7'55.6998"  |
| 13. | 139/35JPL139            | 20                               | Kretinga r.b., Juodkrantė                                              | 55°33'58.32"   | 21°7'40.44"    |
| 14. | 61/49JPL61              | 15                               | Dubrava r.b., Gaižiūnai                                                | 54°58'17.0466" | 24°16'12.6012" |
| 15. | 64/49JPL64              | 20                               | Dubrava r.b., Karmėlava                                                | 55°0' 44748"   | 24°15'5.616"   |
| 16. | 67/15JPL67              | 20                               | Prienai r.b., Dambrava                                                 | 54°41'54.096"  | 23°48'49.356"  |
| 17. | 71/51JPL71              | 19                               | Dubrava r.b., Vaišvydava                                               | 54°43'4.7316"  | 23°47'51.1506" |
| 18. | 78/51JPL78              | 18                               | Dubrava r.b., Ežerėlis                                                 | 54°51'51.0516" | 23°41'27.33"   |
| 19. | 83/16JPL83              | 19                               | Radviliškis r.b., Baisiogala                                           | 55°41'20.4102" | 23°39'21.4266" |
| 20. | 86/20JPL86              | 19                               | Kuršėnai r.b., Gruzdžiai                                               | 56°1'34.698"   | 23°5'54.1896"  |
| 21. | 89/53JPL89              | 20                               | Kuršėnai r.b., Pažiūžmėliai                                            | 56°3'53.5746"  | 22°44'17.667"  |
| 22. | 97/36JPL97              | 20                               | Telšiai r.b., Kuliai                                                   | 55°49'32.79"   | 21°38'33.9246" |
