# Supplementary material for: Can a Forest Tree Species Progeny Trial Serve as an Ex Situ Collection? A Case Study on Alnus glutinosa
Source: MDPI journal article supplement (doi:10.3390/plants12233986), 2023-11-27
Supplement: s1 [file s1]

**Table S1.** Genetic diversity parameters of different *A. glutinosa* sample lots (GCU populations and open pollinated families), compared in present study. *Na* – no of different alleles; *Ne* – effective no of alleles; *Ho* – observed heterozygosity; *He* – expected heterozygosity; *F* – inbreeding coefficient; *Ar* – allelic richness, based on 2 diploid individuals. All genetic diversity parameters are provided with standard errors.

| Sample lot            | <i>Na</i>  | <i>Ne</i> | <i>Ho</i> | <i>He</i> | <i>F<sub>IS</sub></i> | <i>Ar</i> |
|-----------------------|------------|-----------|-----------|-----------|-----------------------|-----------|
| JUO                   | 11.00±0.65 | 4.98±0.46 | 0.64±0.04 | 0.77±0.02 | 0.18±0.04             | 2.94±0.08 |
| VIL                   | 11.12±0.65 | 5.17±0.49 | 0.76±0.03 | 0.76±0.03 | 0.01±0.03             | 2.92±0.11 |
| LEI                   | 11.24±0.79 | 5.22±0.60 | 0.75±0.04 | 0.75±0.04 | 0.01±0.04             | 2.89±0.12 |
| GIR                   | 10.12±0.81 | 5.01±0.49 | 0.75±0.03 | 0.75±0.04 | 0.00±0.03             | 2.89±0.11 |
| SIM                   | 10.65±0.61 | 5.14±0.55 | 0.74±0.04 | 0.75±0.04 | 0.02±0.02             | 2.90±0.11 |
| PUR                   | 10.24±0.75 | 4.85±0.54 | 0.73±0.04 | 0.73±0.04 | -0.00±0.03            | 2.82±0.13 |
| BAT                   | 10.06±0.64 | 5.08±0.54 | 0.73±0.04 | 0.75±0.04 | 0.03±0.03             | 2.89±0.12 |
| PAZ                   | 9.88±0.65  | 4.60±0.47 | 0.73±0.04 | 0.73±0.04 | 0.01±0.03             | 2.81±0.11 |
| MIK                   | 10.47±0.71 | 4.46±0.44 | 0.70±0.04 | 0.72±0.04 | 0.05±0.04             | 2.79±0.11 |
| SPA                   | 10.35±0.78 | 5.15±0.55 | 0.77±0.05 | 0.74±0.05 | -0.03±0.03            | 2.88±0.13 |
| 5 pops combined*      | 14.71±0.83 | 5.30±0.51 | 0.71±0.03 | 0.77±0.03 | 0.08±0.02             | 2.87±0.05 |
| 10 pops combined      | 16.00±0.98 | 5.37±0.55 | 0.73±0.03 | 0.76±0.03 | 0.04±0.02             | 2.88±0.03 |
| family 61             | 6.06±0.53  | 3.30±0.35 | 0.67±0.06 | 0.62±0.05 | -0.06±0.05            | 2.52±0.15 |
| family 64             | 6.88±0.50  | 3.67±0.32 | 0.75±0.06 | 0.68±0.04 | -0.08±0.06            | 2.66±0.11 |
| family 67             | 6.35±0.59  | 3.25±0.31 | 0.69±0.07 | 0.62±0.05 | -0.05±0.06            | 2.54±0.14 |
| family 71             | 6.53±0.46  | 3.58±0.28 | 0.85±0.04 | 0.69±0.03 | -0.21±0.05            | 2.66±0.10 |
| family 78             | 6.18±0.40  | 3.37±0.28 | 0.75±0.05 | 0.66±0.03 | -0.10±0.05            | 2.59±0.10 |
| family 83             | 6.71±0.40  | 3.64±0.28 | 0.72±0.05 | 0.68±0.04 | -0.02±0.05            | 2.68±0.10 |
| family 86             | 6.35±0.51  | 3.46±0.28 | 0.81±0.04 | 0.68±0.03 | -0.17±0.05            | 2.62±0.10 |
| family 89             | 6.47±0.56  | 3.38±0.26 | 0.79±0.06 | 0.67±0.05 | -0.17±0.06            | 2.59±0.10 |
| family 97             | 6.41±0.53  | 3.16±0.30 | 0.70±0.06 | 0.63±0.04 | -0.10±0.07            | 2.49±0.11 |
| family 103            | 6.59±0.56  | 3.44±0.34 | 0.72±0.06 | 0.64±0.05 | -0.10±0.05            | 2.56±0.13 |
| family 104            | 6.12±0.53  | 3.26±0.28 | 0.82±0.05 | 0.65±0.04 | -0.24±0.05            | 2.53±0.11 |
| family 107            | 6.18±0.57  | 3.18±0.38 | 0.61±0.07 | 0.59±0.06 | -0.01±0.06            | 2.45±0.16 |
| family 108            | 7.29±0.48  | 3.81±0.25 | 0.83±0.03 | 0.72±0.02 | -0.13±0.05            | 2.76±0.07 |
| family 112            | 5.94±0.55  | 3.69±0.38 | 0.69±0.08 | 0.65±0.06 | -0.03±0.06            | 2.64±0.15 |
| family 116            | 7.00±0.59  | 3.66±0.28 | 0.83±0.05 | 0.69±0.04 | -0.18±0.05            | 2.67±0.11 |
| family 119            | 6.41±0.42  | 3.50±0.28 | 0.81±0.05 | 0.67±0.04 | -0.19±0.04            | 2.62±0.11 |
| family 121            | 5.82±0.37  | 3.31±0.22 | 0.85±0.05 | 0.67±0.03 | -0.25±0.04            | 2.59±0.09 |
| family 126            | 6.53±0.44  | 3.56±0.26 | 0.80±0.05 | 0.68±0.04 | -0.15±0.04            | 2.66±0.10 |
| family 128            | 5.82±0.54  | 3.10±0.23 | 0.79±0.05 | 0.64±0.03 | -0.21±0.06            | 2.49±0.10 |
| family 132            | 6.41±0.59  | 3.71±0.35 | 0.81±0.06 | 0.67±0.04 | -0.19±0.06            | 2.63±0.13 |
| family 135            | 6.82±0.58  | 3.88±0.26 | 0.87±0.03 | 0.72±0.02 | -0.19±0.05            | 2.75±0.08 |
| family 139            | 6.59±0.51  | 3.65±0.28 | 0.82±0.05 | 0.69±0.04 | -0.17±0.05            | 2.67±0.11 |
| 6 families combined** | 11.65±0.77 | 4.88±0.42 | 0.79±0.04 | 0.75±0.03 | -0.05±0.02            | 2.61±0.04 |
| 22 families cobined   | 13.65±0.92 | 5.39±0.47 | 0.78±0.04 | 0.77±0.04 | -0.01±0.02            | 2.61±0.02 |

\*JUO, VIL, BAT, PAZ, MIK populations

\*\*families 103, 121, 135, 139, 89, 97
