# Supplementary figures and images for: Can a Forest Tree Species Progeny Trial Serve as an Ex Situ Collection? A Case Study on Alnus glutinosa
Source: MDPI journal article supplement (doi:10.3390/plants12233986), 2023-11-27

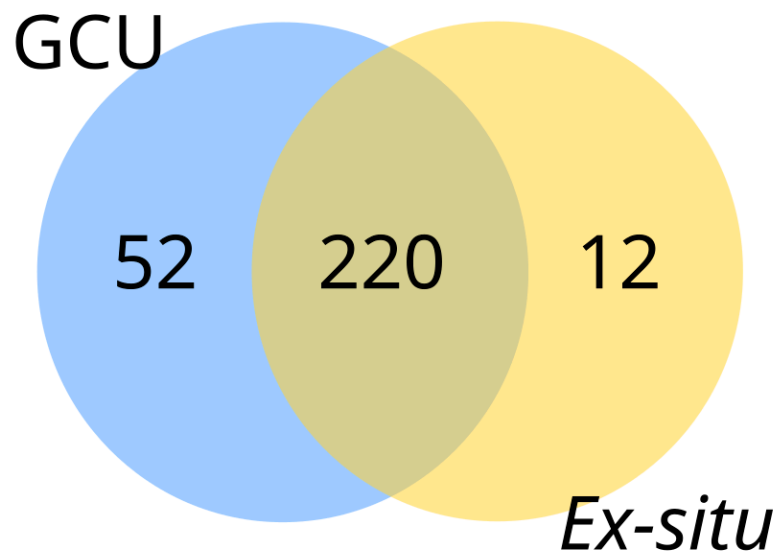

**Figure S2.** Venn diagram of alleles found in natural populations (GCU) and in ex situ plantation.

Supplement: s1 [file s1]
